## Retrospective analysis of risk factors associated with Kawasaki disease in China

Lihua Bai<sup>1,\*</sup>, Tienan Feng<sup>1,2,\*</sup>, Lifang Yang<sup>3,\*</sup>, Yi Zhang<sup>4,\*</sup>, Xuejuan Jiang<sup>1</sup>, Kayiu Liu<sup>1</sup>, Lihua Chen<sup>1</sup>, Xiaoyan Feng<sup>1</sup>, Yanming Rong<sup>1</sup>, Yuehua Li<sup>3</sup>, Zhiqiang Qin<sup>1,5</sup> and Jing Qiao<sup>1</sup>

<sup>1</sup>Department of Pediatrics, Research Center for Translational Medicine, Shanghai East Hospital, Tongji University, Shanghai 200123, China

<sup>2</sup>Hongqiao International Institute of Medicine, Shanghai Tongren Hospital and Faculty of Public Health, Shanghai Jiao Tong University School of Medicine, Shanghai 200025, China

<sup>3</sup>Shanxi Provincial People's Hospital, Xi'an Jiaotong University, Xi'an 710068, China

<sup>4</sup>The 3rd Clinical Medical School, Three Gorges University, Yichang 443002, China

<sup>5</sup>Departments of Genetics, Louisiana State University Health Sciences Center, Louisiana Cancer Research Center, New Orleans, LA 70112, USA

\*These authors contributed equally to this work

**Correspondence to:** Jing Qiao **email:** qiaoj123@hotmail.com  
Zhiqiang Qin **email:** zqin@lsuhsc.edu

**Keywords:** *Kawasaki disease (KD), typical KD, incomplete KD, IVIG ineffectiveness, retrospective analysis*

**Received:** March 16, 2017

**Accepted:** April 14, 2017

**Published:** April 29, 2017

Copyright: Bai et al. This is an open-access article distributed under the terms of the Creative Commons Attribution License 3.0 (CC BY 3.0), which permits unrestricted use, distribution, and reproduction in any medium, provided the original author and source are credited.

### ABSTRACT

**In order to provide early intervention for coronary artery lesion (CAL) caused by Kawasaki Disease (KD), we analyzed clinical characteristics of typical and incomplete KD cases from 1998 to 2008 in Northwest and Central China. A total of 383 patients included 298 cases of typical KD and 85 cases of incomplete KD. The morbidity of incomplete KD was 28.5%, a percentage significantly lower than that of typical KD. The occurrence of bulbar conjunctiva congestion, erythra, crissum red, film-like decrustation, lip red, rhagades, raspberry tongue, bilateral toe-end decrustation, limb sclerosis, cervical lymph nodes enlargement, agitation and irritability in incomplete KD group was lower than that in the group of typical KD ( $p < 0.05$ ); however, the occurrence of unilateral toe-end decrustation, scar reappearance erythema, malaise, fatigue, liver incidence was significant higher in incomplete KD group ( $p < 0.05$ ). Based on lab assays and inspection index comparisons, the incomplete KD cases whose C-reactive protein (CRP) and erythrocyte sedimentation rate (ESR) were significantly increased, had significantly higher reduction in blood platelet (PLT). Interestingly, the KD patients with CPR higher than 30 mg/L, ESR higher than 40 mm/h, hepatomegaly and IVIG ineffectiveness, had higher incidence of CAL development. Altogether, our data have indicated differential clinical characteristics between incomplete KD and typical KD, and have identified several high risk factors of KD for CAL, such as hepatomegaly.**

### INTRODUCTION

Kawasaki Disease (KD) is a condition that causes inflammation in the walls of medium-sized arteries throughout the body. While the disease occurs in early childhood, it is thought to cause dysfunction of the vasculature system and coronary artery lesions (CAL) later in life. The morbidity rate of KD increased in recent years. Since the first case reported by Dr. Kawasaki in 1967, deep

changes of the cardiovascular system associated with KD have also gained attention in clinic [1]. Most of KD cases present the 6 typical symptoms (see below Methods for details), however, some cases that don't completely present with all the typical symptoms are defined as incomplete KD. Those cases are often accompanied to coronary artery dysfunction and cannot be explained with other diseases. The morbidity of incomplete KD in all KD cases is around 10%~36% and they do not respond well to intravenous

immunoglobulin (IVIG) treatment [2–4]. To determine the likelihood of potential adulthood acute coronary artery events, we have performed the retrospective analysis of 383 KD cases with clinical characteristics, treatment and their prognosis collected from 1998 to 2008 in Northwest and Central China.

## RESULTS

### Comparison of the clinical characteristics between incomplete KD and typical KD cases

Among the total 383 patients, there were 85 incomplete KD cases that included 51 males and 34 females (M-F ratio was 1.71:1); 298 typical KD cases included 196 males and 102 females (M-F ratio was 1.92:1). Although slightly different among the two groups, the gender had no statistical significance ( $p > 0.05$ ) (Table 1). In the 85 incomplete KD cases, all the patients had fever for more than 5 days, and the other major clinical characteristics included agitation and irritability (65/85, 77%), bulbar conjunctiva congestion (63/85, 74%), lip red, rhagades and raspberry tongue (46/85, 54%), crissum red and film-like decrustation (44/85, 52%); 42 cases had erythra (42/85, 49%), bilateral toe-end decrustation (34/85, 40%), hepatomegaly (32/85, 38%), limb sclerosis (31/85, 36%). Taken together, the occurrence rates of unilateral toe-end decrustation, scar reappeared erythema, sag, lassitude and hepatomegaly in incomplete KD cases were significantly higher than in those of typical KD cases. The occurrence rates of bulbar conjunctiva congestion, erythra, crissum red, film-like decrustation, lip red, rhagades, raspberry tongue, bilateral toe-end decrustation, limb sclerosis, cervical lymph nodes enlargement, agitation and irritability in incomplete KD cases were obviously lower than those in typical KD cases. Nevertheless, the occurrence rates of pyrexia, crissum hyperaemia desquamation and stomachache had no statistical difference between these two groups.

Comparing the results of laboratory tests and ultrasound data between these two groups, the occurrence rate of C-reactive protein (CRP) increase was 96.5% and Erythrocyte sedimentation rate (ESR) acceleration was 100% for incomplete KD cases, which were significantly higher than the values observed in typical KD cases ( $p < 0.05$ ). The occurrence rate of blood platelet (PLT) increase was 87.1% for incomplete KD cases, which was significantly lower than that of typical KD cases (94.3%,  $p < 0.05$ ). However, the occurrence rates of white blood cell (WBC) increase, Hemoglobin (Hb) decrease, coronary artery ectasia, gallbladder enlargement and chest radiography abnormality had no statistical difference between these two groups. Finally, IVIG-ineffectiveness probability of incomplete KD cases (10.6%) was significantly higher than that of typical KD cases (2.0%,  $p < 0.05$ ).

### Risk factors assessment comparison between typical KD and incomplete KD cases

For the patients who received IVIG therapy ( $n = 383$ ), incomplete KD patients' average age was  $2.87 \pm 2.23$  and typical KD patients' average age was  $3.01 \pm 2.35$ . The average age between two groups had no statistical significance difference. CRP over 30 mg/L, ESR over 40 mm/h, Hepatomegaly and IVIG-ineffectiveness were high risk factors of typical KD (Table 2). Children under one of these conditions, CRP over 30 mg/L, ESR over 40 mm/h, hepatomegaly and IVIG-ineffectiveness showed around 10 folds risk to get typical KD. Other indicators including limb sclerosis, cervical lymph nodes enlargement, bilateral toe-end decrustation, bulbar conjunctival congestion, erythra, lip red rhagades and raspberry tongue were also counted as risk factors, and which showed less than 3 folds to get typical KD ( $p < 0.05$ ).

### Evaluation of risk factors associated with CAL

Next, we evaluated risks possibly associated with CAL. As shown in Table 3, the major risk factors include increased CRP ( $\geq 30$  mg/L), ESR acceleration ( $\geq 40$  mm/h), hepatomegaly and IVIG-ineffectiveness. For instance, our results indicate that the risk of CAL in patients with hepatomegaly is about eight times higher than in those without hepatomegaly.

Based on these factors, we have established a new assessment model. For our clinical samples, the sensitivity was 96.2, the specificity was 83.5 and the accuracy was 93.5. The AUC (area under the curve) score was 0.974 (Figure 1). While this model has potential clinical values, more samples are needed to validate and eventually improve it.

## DISCUSSION

Previous studies have provided the evidences of some epidemiologic features about Chinese KD cases [5–7]. However, to our knowledge, this is the first analysis of the KD hospitalized children in big hospitals in Northwest and Central China. The incidence of coronary artery lesion in incomplete KD cases in our study was around 22.2%, which is consistent with previous data reported oversea by Rowley *et al* (10%–36%) [8], and domestically by Wang *et al* (19.4%) [9].

In this study, the occurrence rates of bulbar conjunctiva congestion, erythra, crissum red, film-like decrustation, lip red, rhagades, raspberry tongue, bilateral toe-end decrustation, limb sclerosis, cervical lymph nodes enlargement, agitation and irritability were significantly lower than typical KD. The occurrence rate of cervical lymph nodes enlargement was 35.3%, which also matched previous report [10]. Furthermore, the occurrence rates of fever, crissum congestion desquamation, and stomachache between two groups had no statistical difference. Thus the atypism of incomplete KD's clinical features could be seen.

**Table 1: Comparison of the clinical characteristics between incomplete KD and typical KD cases**

|                                        | KD condition                 |            | Chi-square | p value |          |
|----------------------------------------|------------------------------|------------|------------|---------|----------|
|                                        | 0 (negative)<br>1 (positive) | Incomplete |            |         | Typical  |
| Hyperemia bulbar                       | 0                            | 22         | 15         | 32.64   | < 0.001* |
|                                        | 1                            | 63         | 283        |         |          |
| erythra                                | 0                            | 43         | 35         | 61.53   | < 0.001* |
|                                        | 1                            | 42         | 263        |         |          |
| Peeling of red crissum membrane        | 0                            | 41         | 161        | 0.89    | 0.35     |
|                                        | 1                            | 44         | 137        |         |          |
| Lip red, rhagades and raspberry tongue | 0                            | 39         | 54         | 27.72   | < 0.001* |
|                                        | 1                            | 46         | 244        |         |          |
| Bilateral toe-end decrustation         | 0                            | 51         | 68         | 42.69   | < 0.001* |
|                                        | 1                            | 34         | 230        |         |          |
| Unilateral toe-end decrustation        | 0                            | 66         | 291        | 41.82   | < 0.001* |
|                                        | 1                            | 19         | 7          |         |          |
| Limb sclerosis                         | 0                            | 54         | 113        | 17.64   | < 0.001* |
|                                        | 1                            | 31         | 185        |         |          |
| Cervical lymph nodes enlargement       | 0                            | 55         | 74         | 47.08   | < 0.001* |
|                                        | 1                            | 30         | 224        |         |          |
| Scar reappeared erythema               | 0                            | 65         | 256        | 4.34    | 0.037*   |
|                                        | 1                            | 20         | 42         |         |          |
| Agitation, irritability                | 0                            | 20         | 32         | 9.22    | 0.002*   |
|                                        | 1                            | 65         | 266        |         |          |
| Sag, lassitude                         | 0                            | 67         | 264        | 5.37    | 0.02*    |
|                                        | 1                            | 18         | 34         |         |          |
| Stomachache                            | 0                            | 55         | 224        | 3.66    | 0.056    |
|                                        | 1                            | 30         | 74         |         |          |
| Hepatomegaly                           | 0                            | 53         | 247        | 16.43   | < 0.001* |
|                                        | 1                            | 32         | 51         |         |          |
| WBC increase $\geq 15 \times 10^9/L$   | 0                            | 8          | 20         | 0.071   | 0.4      |
|                                        | 1                            | 77         | 278        |         |          |
| HB decrease $\leq 10$ g                | 0                            | 26         | 62         | 3.58    | 0.059    |
|                                        | 1                            | 59         | 236        |         |          |
| PLT increase $\geq 450 \times 10^9/L$  | 0                            | 11         | 17         | 5.11    | 0.024*   |
|                                        | 1                            | 74         | 281        |         |          |
| CRP increase ( $\geq 30$ mg/L)         | 0                            | 3          | 63         | 14.38   | < 0.001* |
|                                        | 1                            | 82         | 235        |         |          |
| ESR acceleration ( $\geq 40$ mm/h)     | 0                            | 0          | 94         | 35.53   | < 0.001* |
|                                        | 1                            | 85         | 204        |         |          |
| Coronary artery dilating               | 0                            | 62         | 220        | 0.027   | 0.87     |
|                                        | 1                            | 23         | 78         |         |          |
| Gallbladder enlargement                | 0                            | 74         | 270        | 0.91    | 0.34     |
|                                        | 1                            | 11         | 28         |         |          |
| Chest radiography abnormality          | 0                            | 59         | 197        | 0.33    | 0.56     |
|                                        | 1                            | 26         | 101        |         |          |
| IVIG-ineffectiveness                   | 0                            | 76         | 292        | 12.92   | < 0.001* |
|                                        | 1                            | 9          | 6          |         |          |

**Table 2: Risk factors assessment comparison between typical KD cases and incomplete KD cases**

|                                        | Exp (B) <sup>1</sup> | S.E. <sup>2</sup> | Sig. <sup>3</sup> |
|----------------------------------------|----------------------|-------------------|-------------------|
| Gender                                 | 0.74                 | 0.46              | 0.54              |
| Bulbar conjunctival congestion         | 0.05                 | 0.68              | < 0.001*          |
| Erythra                                | 0.04                 | 0.58              | < 0.001*          |
| Lip red, rhagades and raspberry tongue | 0.23                 | 0.55              | 0.01*             |
| Bilateral toe-end decrustation         | 0.18                 | 0.55              | < 0.001*          |
| Unilateral toe-end decrustation        | 2.81                 | 1.03              | 0.32              |
| Limb sclerosis                         | 0.07                 | 0.58              | < 0.001*          |
| Cervical lymph nodes enlargement       | 0.03                 | 0.61              | < 0.001*          |
| Hepatomegaly                           | 9.96                 | 0.56              | < 0.001*          |
| CRP increase ( $\geq 30$ mg/L)         | 21.32                | 1.17              | 0.01*             |
| ESR acceleration ( $\geq 40$ mm/h)     | 60.14                | 1.24              | < 0.001*          |
| IVIG-ineffectiveness                   | 14.81                | 0.84              | < 0.001*          |
| Constant                               | 2.90                 | 1.44              | 0.51              |

\*Set the non-occurrence condition (0) as the comparison object.

<sup>1</sup>Exp(B) represents the OR value between typical KD cases and incomplete KD cases.

<sup>2</sup>S.E. represents the standard error of B.

<sup>3</sup>Sig. represents the statistics significance.

**Table 3: Risk factors of CAL**

|                                       | Exp (B) <sup>1</sup> | S.E. <sup>2</sup> | Sig. <sup>3</sup> |
|---------------------------------------|----------------------|-------------------|-------------------|
| KD                                    | 1.51                 | 0.35              | 0.24              |
| Gender                                | 0.86                 | 0.27              | 0.57              |
| WBC increase $\geq 15 \times 10^9/L$  | 1.54                 | 0.47              | 0.36              |
| HB low $\leq 10$ g                    | 0.90                 | 0.31              | 0.73              |
| PLT increase $\geq 450 \times 10^9/L$ | 1.83                 | 0.47              | 0.20              |
| CRP increase ( $\geq 30$ mg/L)        | 2.66                 | 0.33              | < 0.001*          |
| ESR acceleration ( $\geq 40$ mm/h)    | 3.71                 | 0.30              | < 0.001*          |
| Hepatomegaly                          | 8.05                 | 0.62              | < 0.001*          |
| Chest radiography abnormality         | 1.04                 | 0.27              | 0.89              |
| IVIG-ineffectiveness                  | 0.02                 | 0.65              | < 0.001*          |

\*Set the non-occurrence condition (0) as the comparison object.

<sup>1</sup>Exp(B) represents the OR value between typical KD cases and incomplete KD cases.

<sup>2</sup>S.E. represents the standard error of B.

<sup>3</sup>Sig. represents the statistics significance.

This research shows CAL occurrence rate in incomplete KD was 27.1% and that in typical KD was 26.2%, which had no statistical significance difference and indicated that all of the patients can erupt simultaneously CAL lesion. Those data were in line with one research in Japan that CAL lesion rate in incomplete KD was not higher than that in typical KD [2], but CAL lesion rate in northwest and central China was higher than that in Japan. Our findings, however, were in disagreement with one inland literature [11] showing that incomplete KD erupts simultaneously in coronary artery lesion more

easily than typical KD. From the experimental point of view, the occurrence rates of CRP rising and ESR speed-up were obviously higher in incomplete KD cases compared to typical KD, while blood platelet increase was significantly lower in incomplete KD compared to typical KD. Finally, WBC increase, Hb decrease, CAL, gallbladder enlargement and chest radiography abnormality between the two groups had no statistical difference. At present, most of domestic and overseas researchers showed that the parameters of CRP rising  $\geq 30$  mg/L and (or) ESR speed-up  $\geq 40$  mm/h combined

with clinic analysis can be considered as diagnostic factors for incomplete KD, and our research confirmed the validity of those factors. In addition, our research showed that IVIG ineffectiveness rate in incomplete KD was 9%, a percentage significantly higher than typical KD. At present, the mechanism of IVIG ineffectiveness is still unclear, so there is no consensus on the treatment strategies for IVIG-ineffective patients. Kohayashi had reported results from a study performed in multi-center, foresight and random research observing severe KD patients (danger grade > 5). The study concluded that the occurrence rate of coronary artery lesion could be reduced by standard regimen of IVIG combined with aspirin and prednisolone [12]. The experimental group had 121 cases and control untreated group had 121 cases. The occurrence rate of coronary artery lesion of experimental group (3%) was lower than that of control group (23%). The fever time of experimental group was shorter, and its IVIG second request was also obviously less than that of standard scheme group ( $p < 0.001$ ).

According to Harada score and related literature, risk factors for CAL lesions in KD are the following: being a male, being under 1 year old, having plasma albumin 35g/L or less, CRP strong positive, WBC >  $12 \times 10^9/L$ , PLT <  $300 \times 10^9/L$  and Hc < 35% [13–15]. Interestingly, this study showed CRP > 30 mg/L or ESR > 40 mm/h, hepatomegaly and IVIG-ineffectiveness were important risk factors for CAL lesions, while gender and increased WBC had no correlation with CAL lesions in KD.

In summary, KD is currently thought to be the main reason for the occurrence of heart diseases in children. It has been reported that KD patients have thrombosis related acute coronary syndrome risk in their young adulthood. In recent years the influence of acute coronary events in

adulthood in children who had coronary artery structure and function changed after KD in childhood has received particular attention. To reduce CAL complications and to improve the prognosis it is recommended to monitor and record from childhood to adulthood the parameters of CRP  $\geq 30$  mg/L, ESR  $\geq 40$  mm/h, hepatomegaly and IVIG ineffectiveness, as those parameters are associated with the risk of developing heart diseases.

## MATERIALS AND METHODS

### Clinical data

From 1998 to 2008, Shanxi Provincial People's Hospital Attached to Xi'An Jiaotong University in Northwest China had treated 137 KD patients including 39 incomplete KD cases; the Third Clinical Medical School Attached to Three Gorges University in Central China had treated 246 KD patients including 46 incomplete KD cases. Incomplete KD patients' average age was  $2.87 \pm 2.23$  and typical KD patients' average age was  $3.01 \pm 2.35$ . The patients with symptoms not fully matching KD or incomplete KD diagnostic criteria (see below) or with missing medical records were excluded in our study. We have the access to all the involved patients' identifying information when collecting the data. All the clinical data for these patients (e.g. specific diagnostic/laboratory tests or clinical observations) were acquired from their individual medical records. All the research involving human participants have been approved by Review Board (IRB) Committee of the institutes mentioned above, and written informed consent have been obtained from the participants.

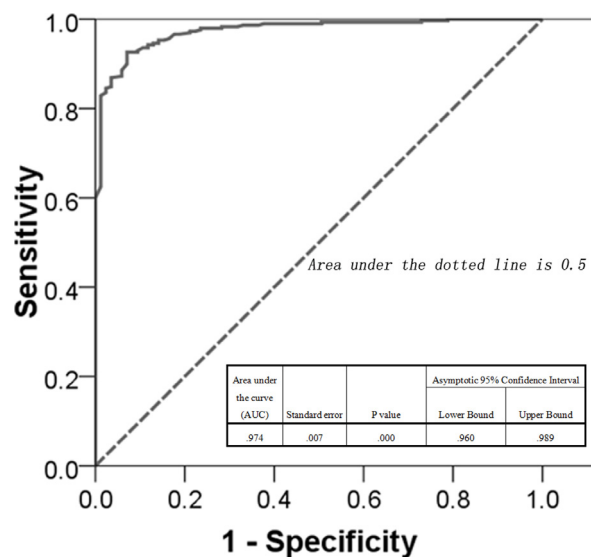

**Figure 1: ROC curve of our model (AUC = 0.974).** The values calculated by our model were used as the predictors, and the outcome indicators were set as reference measure. The curve was produced by using ROC module of SPSS20.0 software, which illuminating the predicting accuracy of our model.



## Diagnostic criteria

Typical KD has 6 diagnostic criteria [16]: ① Fever for 5 days or above. ② Bilateral bulbar conjunctival congestion. ③ Lip and mouth pathological changes including lip dry, redness and rhagades, mouth and pharyngeal diffuse congestion. ④ Extremities pathological changes including hand-foot swelling, palmar and plantar erythema, finger-toe-end membraniform decrustation in recovery phase. ⑤ Pleomorphic erythra which appears mostly in the trunk but without hydroa and incrustation. ⑥ Lymphonodiverticulae's non-suppurative swelling. Typical KD must meet at least 5 of the 6 criteria listed above. The diagnostic criteria of coronary artery dilation is inner diameter > 3 mm for children under 5 years old and inner diameter > 4 mm for children over 5 years old. In addition, the diagnostic criteria for coronary aneurysm are coronary artery localized or diffused dilation whose diameter is 1.5 times larger than adjacent normal coronary artery. Small coronary aneurysm's inner diameter is set as 4.1 to 4.9 mm, medium coronary aneurysm's inner diameter is 5.0 to 7.9 mm, and large coronary aneurysm's inner diameter is more than 8 mm. Incomplete KD is defined as KD in which less than 5 of the 6 criteria, e.g. only 3 to 4 criteria, and for which other diseases have been excluded. The criteria of IVIG-ineffective KD or IVIG refractory KD is defined as body temperature kept over 38°C for more than 48 hours after IVIG treatment or recrudescence fever occurs 2 to 7 days or even 2 weeks after treatment and has at least one KD's diagnostic criteria [10, 17, 18].

## Therapeutic strategies

After definitive diagnosis, all patients are treated as typical KD, including oral administration of aspirin with the following regimen: a dose of 30~50 mg/kg 3 times a day for fever disappeared, followed by a dose of 5 mg/kg/d for 6~8 weeks. If the coronary artery lesions occurred, the aspirin treatment was prolonged until the coronary artery was rehabilitated; in addition, IVIG was administered at the dose of 1~2 g/kg one or two times a day for 2~3 days.

Statistical analysis was performed using the SPSS20.0 (SPSS, Chicago, IL, USA) software. Measurement data was depicted as  $x \pm SD$ ; two-tailed *t*-test analysis was used for comparison between two groups. The enumeration data were compared by the Chi-square test or the Fisher's test. Possible interactions between KD and co-morbidity factors were evaluated through an unconditional binary logistic regression analysis represented as odds ratio at 95% CI. Statistical significance was set at  $p < 0.05$ .

## ACKNOWLEDGMENTS AND FUNDING

We thank the instruction given by Mr. Tomisaku Kawasaki from KD Research Center and the financial aid

from Life Consortium Corporation in Japan. We also thank Dr. Francesca Peruzzi at LSUHSC-NO for helping the edition of this manuscript. J.Q. was supported by funding from Shanghai Science and Technology committee (No.14411971400) and Pudong Science and Technology Committee, Shanghai (No.PK2013-17). Funding sources had no role in study design, data collection and analysis, decision to publish, or preparation of the manuscript.

## CONFLICTS OF INTEREST

All the authors declare no potential conflicts of interest.

## REFERENCES

1. Kawasaki T. [Acute febrile mucocutaneous syndrome with lymphoid involvement with specific desquamation of the fingers and toes in children]. [Article in Japanese]. *Arerugi*. 1967; 16:178-222.
2. Uehara R, Yashiro M, Hayasaka S, Oki I, Nakamura Y, Muta H, Ishii M, Matsuishi T, Sonobe T, Yanagawa H. Serum alanine aminotransferase concentrations in patients with Kawasaki disease. *Pediatr Infect Dis J*. 2003; 22:839-842.
3. Zhang QY, Du JB. [Current state of diagnosis and treatment of incomplete Kawasaki disease]. [Article in Chinese]. *ZhonghuaErKeZaZhi*. 2006; 44:339-341.
4. Zhang QY, Du JB, Chen YH, Li WZ. [Change in plasma N-terminal pro-brain natriuretic peptide in children with Kawasaki disease and its value in clinical practice]. [Article in Chinese]. *ZhonghuaErKeZaZhi*. 2006; 44:886-890.
5. Jiao F, Yang L, Qiao J, Li Y, Zhang T, Liu C. [Epidemiological and clinical characteristics of Kawasaki disease in Shanxi province]. [Article in Chinese]. *Zhonghua Liu Xing Bing XueZaZhi*. 2000; 21:97-99.
6. Wang D, Hu B, Wang F, Zhang T, Liu C. [Study on the epidemiological features of Kawasaki disease in Jiangsu]. [Article in Chinese]. *Zhonghua Liu Xing Bing XueZaZhi*. 2000; 21:94-96.
7. Du ZD, Liang L, Meng XP, Li T, Zhang TH, Kawasaki T, Yanagawa H, Beijing Children Kawasaki Disease Co-operation g. [Epidemiologic study of admitted children with Kawasaki disease in Beijing from 1995 to 1999]. [Article in Chinese]. *Zhonghua Yi XueZaZhi*. 2003; 83:1874-1878.
8. Rowley AH. Incomplete (atypical) Kawasaki disease. *Pediatr Infect Dis J*. 2002; 21:563-565.
9. Wang L, Lin Y, Su YZ, Wang Y, Zhao D, Wu TJ. [Review and analysis of 283 cases of Kawasaki disease]. [Article in Chinese]. *ZhonghuaErKeZaZhi*. 2004; 42:609-612.
10. Wang YQ, Cao XJ. [Updates on diagnosis and management of Kawasaki disease unresponsive to intravenous gamma globulin]. [Article in Chinese]. *ZhonghuaErKeZaZhi*. 2005; 43:226-228.
11. Lin Y, Du ZD, Du JB. [Retrospective analysis of clinical features of Kawasaki disease in 138 children

- below 6 months of age]. [Article in Chinese]. *ZhonghuaErKeZaZhi*. 2008; 46:382–383.
12. Kaneko K, Yoshimura K, Ohashi A, Kimata T, Shimo T, Tsuji S. Prediction of the risk of coronary arterial lesions in Kawasaki disease by brain natriuretic peptide. *Pediatr Cardiol*. 2011; 32:1106–1109.
  13. Kim DS. Kawasaki disease. *Yonsei Med J*. 2006; 47:759–772.
  14. Kobayashi T, Inoue Y, Takeuchi K, Okada Y, Tamura K, Tomomasa T, Kobayashi T, Morikawa A. Prediction of intravenous immunoglobulin unresponsiveness in patients with Kawasaki disease. *Circulation*. 2006; 113:2606–2612.
  15. Anderson MS, Todd JK, Glode MP. Delayed diagnosis of Kawasaki syndrome: an analysis of the problem. *Pediatrics*. 2005; 115:e428–433.
  16. JCS Joint Working Group. Guidelines for diagnosis and management of cardiovascular sequelae in Kawasaki disease (JCS 2008)—digest version. *Circ J*. 2010; 74:1989–2020.
  17. Newburger JW, Takahashi M, Gerber MA, Gewitz MH, Tani LY, Burns JC, Shulman ST, Bolger AF, Ferrieri P, Baltimore RS, Wilson WR, Baddour LM, Levison ME, et al, and Committee on Rheumatic Fever, Endocarditis and Kawasaki Disease, and Council on Cardiovascular Disease in the Young, and American Heart Association, and American Academy of Pediatrics. Diagnosis, treatment, and long-term management of Kawasaki disease: a statement for health professionals from the Committee on Rheumatic Fever, Endocarditis and Kawasaki Disease, Council on Cardiovascular Disease in the Young, American Heart Association. *Circulation*. 2004; 110:2747–2771.
  18. Shulman ST, Rowley AH. Advances in Kawasaki disease. *Eur J Pediatr*. 2004; 163:285–291.
